# Supplementary material for: Outplanting technique, host genotype, and site affect the initial success of outplanted Acropora cervicornis
Source: PeerJ. 2018 Feb 28;6:e4433. doi: 10.7717/peerj.4433 (PMC5834935; doi:10.7717/peerj.4433)
Supplement: Supplemental Information 1 [file peerj-06-4433-s001.xlsx]

## Sheet: Density
Density	Site	Plot #	Survival 0-1 YR	Survial 1-2 YR	Missing 0-1	Missing 1-2	Broken 0-1	Broken 1-2	Predation 0-1	Predation 1-2	Disease 0-1	Disease 1-2	Bleaching 0-1	Bleaching 1-2	Partial Mort 0-1	Partial Mort 1-2
High	Exp 1	H1-1	0.96	0.791667	0.04	0.166667	0	0.0465116	0.00813008	0.0581395	0	0.0465116	0	0.0116279	0.0170833	0.0268421
High	Exp 1	H1-2	0.92	0.73913	0.08	0.217391	0.0434783	0.05	0	0.05	0	0.025	0.026087	0	0.00217391	0.246471
High	Exp 1	H1-3	0.96	0.708333	0.04	0.208333	0.0166667	0.0864198	0	0.0864198	0	0.0246914	0.0166667	0.0123457	0.0025	0.11
High	Exp 2	H2-1	0.8	0.85	0.12	0.1	0.0707965	0.027027	0	0.0135135	0	0.0540541	0	0	0.0025	0.0770588
High	Exp 2	H2-2	0.92	0.73913	0.08	0.130435	0.0245902	0.0266667	0.00819672	0.0666667	0	0	0	0	0.0652174	0.0264706
High	Exp 2	H2-3	0.96	0.833333	0.04	0.125	0.0243902	0.0229885	0	0.0229885	0	0.0114943	0	0	0.0145833	0.198
High	Exp 3	H3-1	0.28	0.714286	0.72	0.142857	0.0138889	0.0909091	0.0138889	0.0454545	0	0	0	0.0909091	0	0.046
High	Exp 3	H3-2	0.8	0.45	0.2	0.55	0.018018	0	0.00900901	0.0188679	0	0.0188679	0	0	0.0725	0.09
High	Exp 3	H3-3	0.64	0.75	0.36	0.25	0.0714286	0.0357143	0.0102041	0	0	0	0	0.0178571	0.0125	0.0208333
High	Exp 4	H4-1	0.68	0.823529	0.28	0.117647	0.00934579	0.0819672	0	0.0655738	0.00934579	0.114754	0	0	0.0147059	0.217857
High	Exp 4	H4-2	0.44	0.636364	0.52	0.272727	0.0102041	0.0277778	0.0306122	0.0833333	0.0102041	0	0	0.0277778	0.00909091	0.174286
High	Exp 4	H4-3	0.48	0.666667	0.52	0.166667	0.029703	0	0.00990099	0.2	0	0.075	0	0	0.154167	0.15375
Medium	Exp 1	M1-1	0.75	0.666667	0.25	0.333333	0	0.2	0	0.1	0	0	0.0526316	0	0.0166667	0
Medium	Exp 1	M1-2	1	1	0	0	0.05	0.1875	0	0	0	0.0625	0	0	0	0.005
Medium	Exp 1	M1-3	1	1	0	0	0	0.125	0	0	0	0.0625	0	0	0.0625	0.1
Medium	Exp 2	M2-1	1	1	0	0	0	0	0	0.0625	0	0	0	0	0	0.0025
Medium	Exp 2	M2-2	1	1	0	0	0	0.125	0	0	0	0	0	0.0625	0	0
Medium	Exp 2	M2-3	1	1	0	0	0	0.125	0	0	0	0	0	0.0625	0	0
Medium	Exp 3	M3-1	1	0.75	0	0.25	0.05	0.166667	0.05	0	0	0	0	0	0	0
Medium	Exp 3	M3-2	0.25	0	0.75	1	0	0	0	0.5	0	0	0	0	0.3
Medium	Exp 3	M3-3	0.5	1	0.5	0	0.0625	0	0	0	0	0	0	0.25	0	0
Medium	Exp 4	M4-1	0.75	0.666667	0.25	0	0	0	0	0.111111	0	0	0	0	0	0
Medium	Exp 4	M4-2	1	1	0	0	0	0	0	0.125	0	0	0	0	0.0125	0.1125
Medium	Exp 4	M4-3	0.25	1	0.75	0	0	0	0	0	0	0	0	0	0	0
Low	Exp 1	L1-1	1	1	0	0	0	0.25	0	0	0	0	0	0	0	0.01
Low	Exp 1	L1-2	1	1	0	0	0.2	0	0	0	0	0	0	0	0	0
Low	Exp 1	L1-3	1	1	0	0	0	0.25	0	0	0	0	0	0	0	0.05
Low	Exp 2	L2-1	1	1	0	0	0	0	0	0	0	0	0	0	0	0
Low	Exp 2	L2-2	1	1	0	0	0	0	0	0	0	0	0	0	0.3	0.02
Low	Exp 2	L2-3	1	1	0	0	0	0	0	0	0	0	0	0	0	0
Low	Exp 3	L3-1	1	1	0	0	0	0.5	0	0.25	0	0	0	0	0	0
Low	Exp 3	L3-2	0		0		0		0		0		0		0
Low	Exp 3	L3-3	0		1		0.25		0		0		0		0
Low	Exp 4	L4-1	0		0		0		0		0		0		0
Low	Exp 4	L4-2	1	1	0	0	0.4	0	0	0	0	0	0	0	0	0
Low	Exp 4	L4-3	1	1	0	0	0	0	0	0	0	0	0	0	0	0.03

## Sheet: SizeAttachment
Survival.days	Outcome	Status	Status2	Site	Array	Colony.Number	Treatment	Genotype	Size	Production	Growth		Site	Genotype	Array	Size Class	Attachement Technique	Disease	Predation	Bleaching	bleaching log	Broken	Total Missing	Mean Partial Mortality	n surviving to 1 year	n original	Survival		Colony #	Site	Genotype	Array	Re-Calculated Size Class CPCe	Treatment	Sum of Total mortality	percent
377	Alive	Censored	Censored	Staghorn City	HC1	1	e	15	s	3.86677	51.7503		Staghorn City	15	HC1	s	e	0	0	0.142857	0.0579919	0	0.5	0	1	2	0.5		1	Staghorn City	15	HC1	s	e	0	0
377	Alive	Censored	Censored	Staghorn City	HC1	2	n	15	xl	5.06384	340.688		Staghorn City	15	HC1	s	n	0	0	0	0	0.2	0	0	2	2	1		1	Staghorn City	9a	HC2	s	e	0	0
377	Alive	Censored	Censored	Staghorn City	HC1	3	p	15	s	5.06567	79.6969		Staghorn City	15	HC1	s	p	0	0	0	0	0.1	0	0	2	2	1		1	Aruba's	9	HC5	s	e	0	0
377	Alive	Censored	Censored	Staghorn City	HC1	4	n	3a	l	5.00576	214.16		Staghorn City	15	HC1	m	e	0	0	0	0	0.2	0	15	1	1	1		1	Aruba's	10a	HC4	s	e	0	0
377	Alive	Censored	Censored	Staghorn City	HC1	5	e	15	xl	5.18333	465.585		Staghorn City	15	HC1	l	e	0	0	0.2	0.0791812	0.2	0	0	1	1	1		1	South Commercial	10	HC7	s	e	0	0
377	Alive	Censored	Censored	Staghorn City	HC1	6	n	15	s	5.07854	69.5126		Staghorn City	15	HC1	l	n	0	0	0	0	0	1	100	0	1	0		1	South Commercial	13	HC9	s	e	10	0.1
377	Alive	Censored	Censored	Staghorn City	HC1	7	e	15	m	5.27708	180.88		Staghorn City	15	HC1	l	p	0	0	0	0	0.2	0	0	1	1	1		1	South Commercial	17	HC8	s	e	0	0
377	Alive	Censored	Censored	Staghorn City	HC1	8	n	3a	s	6.15628	86.5564		Staghorn City	15	HC1	xl	e	0	0	0.1	0.0413927	0.2	0	0	2	2	1		2	Staghorn City	15	HC1	xl	n	0	0
377	Alive	Censored	Censored	Staghorn City	HC1	9	e	3a	xl	2.5551	136.434		Staghorn City	15	HC1	xl	n	0	0	0.0714286	0.0299632	0	0	3.33333	3	3	1		2	Staghorn City	3a	HC3	l	n	0	0
261	missing	Complete	Complete	Staghorn City	HC1	10	p	3a	s	NA	NA		Staghorn City	15	HC1	xl	p	0	0	0	0	0	0	0.333333	3	3	1		2	Staghorn City	9a	HC2	s	n	0	0
377	Alive	Censored	Censored	Staghorn City	HC1	11	e	9a	l	4.66719	186.58		Staghorn City	15	HC2	s	e	0	0	0	0	0	1	100	0	2	0		2	Aruba's	8	HC6	m	n	0	0
377	Alive	Censored	Censored	Staghorn City	HC1	12	e	3a	xl	-0.145632	-10.1843		Staghorn City	15	HC2	s	n	0	0	0	0	0	0	2.5	2	2	1		2	Aruba's	9	HC5	m	n	50	0.5
377	Alive	Censored	Censored	Staghorn City	HC1	13	n	9a	s	14.769	95.5765		Staghorn City	15	HC2	s	p	0	0	0	0	0.222222	0.5	0	1	2	0.5		2	South Commercial	10	HC7	l	n	0	0
377	Alive	Censored	Censored	Staghorn City	HC1	14	p	15	xl	3.56265	236.196		Staghorn City	15	HC2	m	n	0	0	0	0	0	0	0	1	1	1		2	South Commercial	13	HC9	s	n	0	0
377	Alive	Censored	Censored	Staghorn City	HC1	15	e	9a	m	4.05705	118.232		Staghorn City	15	HC2	m	p	0	0	0	0	0	0.5	5	1	2	0.5		2	South Commercial	17	HC8	m	n	0	0
261	missing	Complete	Complete	Staghorn City	HC1	16	p	3a	xl	NA	NA		Staghorn City	15	HC2	l	e	0	0	0	0	0.1	0	0	2	2	1		3	Staghorn City	15	HC1	s	p	0	0
377	Alive	Censored	Censored	Staghorn City	HC1	17	p	15	xl	4.12166	271.658		Staghorn City	15	HC2	l	n	0	0	0	0	0	0	0	1	1	1		3	Staghorn City	3a	HC3	s	p	0	0
377	Alive	Censored	Censored	Staghorn City	HC1	18	n	15	xl	4.13793	376.501		Staghorn City	15	HC2	xl	e	0	0.1	0	0	0	0	0	2	2	1		3	Aruba's	10a	HC4	m	p	0	0
377	Alive	Censored	Censored	Staghorn City	HC1	19	p	3a	xl	2.62339	191.782		Staghorn City	15	HC2	xl	n	0	0.1	0	0	0.1	0	2.5	2	2	1		4	Staghorn City	15	HC2	m	n	0	0
377	Alive	Censored	Censored	Staghorn City	HC1	20	n	3a	xl	1.66662	135.019		Staghorn City	15	HC2	xl	p	0	0	0	0	0.2	0	0	2	2	1		4	Staghorn City	3a	HC1	l	n	0	0
377	Alive	Censored	Censored	Staghorn City	HC1	21	n	9a	l	1.17492	73.3723		Staghorn City	15	HC3	s	e	0	0	0	0	0	1	100	0	1	0		4	Staghorn City	9a	HC3	m	n	0	0
377	Alive	Censored	Censored	Staghorn City	HC1	22	p	9a	m	3.97802	134.746		Staghorn City	15	HC3	s	n	0	0	0	0	0	0	10	1	1	1		4	Aruba's	8	HC4	m	n	0	0
377	Alive	Censored	Censored	Staghorn City	HC1	23	p	9a	m	4.36507	101.959		Staghorn City	15	HC3	s	p	0	0	0	0	0	1	100	0	1	0		4	South Commercial	10	HC8	l	n	0	0
261	missing	Complete	Complete	Staghorn City	HC1	24	e	3a	s	NA	NA		Staghorn City	15	HC3	l	e	0	0	0	0	0.2	0	0	1	1	1		4	South Commercial	13	HC7	s	n	0	0
377	Alive	Censored	Censored	Staghorn City	HC1	25	e	15	l	0.0125204	0.723707		Staghorn City	15	HC3	l	n	0	0	0	0	0.2	0	25	1	1	1		4	South Commercial	17	HC9	s	n	0	0
377	Alive	Censored	Censored	Staghorn City	HC1	26	p	9a	xl	2.64343	214.805		Staghorn City	15	HC3	l	p	0	0	0	0	0.4	0	1	1	1	1		5	Staghorn City	15	HC1	xl	e	0	0
377	Alive	Censored	Censored	Staghorn City	HC1	27	n	9a	m	6.66469	141.238		Staghorn City	15	HC3	xl	e	0	0	0	0	0.2	0	10	1	1	1		5	Staghorn City	3a	HC3	l	e	0	0
261	missing	Complete	Complete	Staghorn City	HC1	28	n	15	l	NA	NA		Staghorn City	15	HC3	xl	n	0	0	0	0	0.2	0	30	1	1	1		5	Staghorn City	9a	HC2	m	e	15	0.15
377	Alive	Censored	Censored	Staghorn City	HC1	29	n	15	s	2.00519	14.1962		Staghorn City	15	HC3	xl	p	0	0	0.2	0.0791812	0.2	0	0	1	1	1		5	Aruba's	8	HC6	xl	e	5	0.05
377	Alive	Censored	Censored	Staghorn City	HC1	30	p	15	s	2.91401	46.9151		Staghorn City	3a	HC1	s	e	0	0	0	0	0	1	100	0	1	0		5	Aruba's	9	HC5	l	e	30	0.3
377	Alive	Censored	Censored	Staghorn City	HC1	31	e	3a	xl	1.96116	135.585		Staghorn City	3a	HC1	s	n	0	0	0	0	0	0	0	1	1	1		5	Aruba's	10a	HC4	xl	e	99	0.99
377	Alive	Censored	Censored	Staghorn City	HC1	32	p	15	xl	2.57417	305.604		Staghorn City	3a	HC1	s	p	0	0	0	0	0	0.5	0	1	2	0.5		5	South Commercial	10	HC7	xl	e	0	0
377	Alive	Censored	Censored	Staghorn City	HC1	33	n	3a	m	-0.337613	-6.4819		Staghorn City	3a	HC1	m	e	0	0	0	0	0.2	0	0	1	1	1		5	South Commercial	13	HC9	xl	e	5	0.05
377	Alive	Censored	Censored	Staghorn City	HC1	34	n	15	xl	3.97236	332.417		Staghorn City	3a	HC1	m	n	0	0	0	0	0.4	0	0	1	1	1		5	South Commercial	15	HC8	l	e	0	0
261	missing	Complete	Complete	Staghorn City	HC1	35	e	9a	s	NA	NA		Staghorn City	3a	HC1	l	n	0	0	0	0	0	0	0	2	2	1		6	Staghorn City	15	HC1	s	n	0	0
377	Alive	Censored	Censored	Staghorn City	HC1	36	p	15	l	5.90477	254.603		Staghorn City	3a	HC1	l	p	0	0	0	0	0	1	100	0	2	0		6	Staghorn City	3a	HC3	m	n	0	0
377	Alive	Censored	Censored	Staghorn City	HC1	37	n	3a	xl	2.42433	195.831		Staghorn City	3a	HC1	xl	e	0	0	0	0	0.1	0	8.75	4	4	1		6	Staghorn City	9a	HC2	s	n	0	0
261	missing	Complete	Complete	Staghorn City	HC1	38	p	3a	l	NA	NA		Staghorn City	3a	HC1	xl	n	0	0	0	0	0.1	0	0	2	2	1		6	Aruba's	8	HC6	s	n	0	0
377	Alive	Censored	Censored	Staghorn City	HC1	39	e	15	xl	3.29967	300.039		Staghorn City	3a	HC1	xl	p	0	0	0	0	0.125	0.5	0	1	2	0.5		6	Aruba's	9	HC5	s	n	10	0.1
156	missing	Complete	Complete	Staghorn City	HC1	40	e	15	s	NA	NA		Staghorn City	3a	HC2	s	e	0	0	0	0	0	1	100	0	1	0		6	South Commercial	10	HC7	s	n	0	0
377	Alive	Censored	Censored	Staghorn City	HC1	41	n	3a	l	5.90105	217.369		Staghorn City	3a	HC2	s	n	0	0	0	0	0	0	0	1	1	1		6	South Commercial	13	HC9	s	n	0	0
261	missing	Complete	Complete	Staghorn City	HC1	42	p	3a	l	NA	NA		Staghorn City	3a	HC2	s	p	0	0	0	0	0.2	0	0	1	1	1		7	Staghorn City	15	HC1	m	e	15	0.15
377	Alive	Censored	Censored	Staghorn City	HC1	43	p	3a	s	8.76774	71.2694		Staghorn City	3a	HC2	m	n	0	0	0	0	0	0	100	0	1	0		7	Staghorn City	3a	HC3	l	e	20	0.2
377	Alive	Censored	Censored	Staghorn City	HC1	44	e	3a	xl	2.48216	187.146		Staghorn City	3a	HC2	l	n	0	0	0	0	0	0	0	1	1	1		7	Staghorn City	9a	HC2	m	e	0	0
377	Alive	Censored	Censored	Staghorn City	HC1	45	e	3a	m	3.78138	72.2029		Staghorn City	3a	HC2	xl	e	0	0.125	0.125	0.0511525	0	0	50	1	2	0.5		7	Aruba's	8	HC6	m	e	5	0.05
377	Alive	Censored	Censored	Staghorn City	HC2	1	e	9a	s	10.6895	82.5183		Staghorn City	3a	HC2	xl	p	0	0	0	0	0.2	0	0	2	2	1		7	Aruba's	10a	HC4	l	e	45	0.45
377	Alive	Censored	Censored	Staghorn City	HC2	2	n	9a	s	4.47151	47.7437		Staghorn City	3a	HC3	s	e	0	0	0	0	0	0	100	0	1	0		7	South Commercial	10	HC7	l	e	40	0.4
261	missing	Complete	Complete	Staghorn City	HC2	3	p	9a	s	NA	NA		Staghorn City	3a	HC3	s	n	0	0	0	0	0.4	0	1	1	1	1		7	South Commercial	13	HC9	m	e	0	0
377	Alive	Censored	Censored	Staghorn City	HC2	4	n	15	m	7.51126	243.239		Staghorn City	3a	HC3	s	p	0	0	0	0	0.1	0	0	2	2	1		7	South Commercial	17	HC8	m	e	0	0
377	Alive	Censored	Censored	Staghorn City	HC2	5	e	9a	m	1.11509	39.5312		Staghorn City	3a	HC3	m	e	0	0	0	0	0	1	100	0	1	0		8	Staghorn City	15	HC2	s	n	5	0.05
377	Alive	Censored	Censored	Staghorn City	HC2	6	n	9a	s	8.01633	105.562		Staghorn City	3a	HC3	m	n	0	0	0	0	0.1	0	27.5	2	2	1		8	Staghorn City	3a	HC1	s	n	0	0
377	Alive	Censored	Censored	Staghorn City	HC2	7	e	9a	m	1.62433	58.615		Staghorn City	3a	HC3	l	e	0.0666667	0	0	0	0	0	7	3	3	1		8	Staghorn City	9a	HC3	m	n	30	0.3
377	Alive	Censored	Censored	Staghorn City	HC2	8	n	15	s	4.50149	63.3611		Staghorn City	3a	HC3	l	n	0	0	0.0714286	0.0299632	0.133333	0	1.66667	3	3	1		8	Aruba's	8	HC4	m	n	0	0
377	Alive	Censored	Censored	Staghorn City	HC2	9	e	15	xl	4.39607	352.036		Staghorn City	3a	HC3	xl	e	0	0	0	0	0	0	10	1	1	1		8	Aruba's	9	HC6	s	n	0	0
377	Alive	Censored	Censored	Staghorn City	HC2	10	p	15	s	10.1066	109.872		Staghorn City	3a	HC3	xl	p	0	0	0	0	0	0.5	10.25	2	4	0.5		8	Aruba's	10a	HC5	m	n	50	0.5
261	Dead	Complete	Censored	Staghorn City	HC2	11	e	3a	xl	NA	NA		Staghorn City	9a	HC1	s	e	0	0	0	0	0	1	100	0	1	0		8	South Commercial	10	HC8	s	n	0	0
377	Alive	Censored	Censored	Staghorn City	HC2	12	e	15	l	3.65851	205.349		Staghorn City	9a	HC1	s	n	0	0	0	0	0	0	0	1	1	1		8	South Commercial	17	HC9	s	n	90	0.9
377	Alive	Censored	Censored	Staghorn City	HC2	13	n	3a	s	6.46742	71.8358		Staghorn City	9a	HC1	m	e	0	0	0	0	0	0	0	1	1	1		9	Staghorn City	15	HC2	xl	e	0	0
261	missing	Complete	Complete	Staghorn City	HC2	14	p	9a	l	NA	NA		Staghorn City	9a	HC1	m	n	0	0	0	0	0	0	0	1	1	1		9	Staghorn City	3a	HC1	xl	e	35	0.35
377	Alive	Censored	Censored	Staghorn City	HC2	15	e	3a	xl	2.484	191.337		Staghorn City	9a	HC1	m	p	0	0	0.1	0.0413927	0	0	0	2	2	1		9	Aruba's	8	HC4	xl	e	90	0.9
377	Alive	Censored	Censored	Staghorn City	HC2	16	p	15	xl	3.6377	283.656		Staghorn City	9a	HC1	l	e	0	0	0	0	0	0	0	1	1	1		9	Aruba's	15	HC6	xl	e	0	0
377	Alive	Censored	Censored	Staghorn City	HC2	17	p	9a	l	3.07798	146.551		Staghorn City	9a	HC1	l	n	0	0	0	0	0.2	0	0	1	1	1		9	Aruba's	10a	HC5	xl	e	0	0
377	Alive	Censored	Censored	Staghorn City	HC2	18	n	9a	l	4.7117	233.553		Staghorn City	9a	HC1	xl	p	0	0	0	0	0	0	30	1	1	1		9	South Commercial	2	HC9	xl	e	0	0
377	Alive	Censored	Censored	Staghorn City	HC2	19	p	15	m	4.63695	147.825		Staghorn City	9a	HC2	s	e	0	0	0	0	0	0	0	2	2	1		9	South Commercial	10	HC8	l	e	0	0
377	Alive	Censored	Censored	Staghorn City	HC2	20	n	15	xl	6.42145	439.232		Staghorn City	9a	HC2	s	n	0	0	0	0	0	0	0	3	3	1		9	South Commercial	13	HC7	xl	e	0	0
377	Alive	Censored	Censored	Staghorn City	HC2	21	n	3a	l	3.73366	208.784		Staghorn City	9a	HC2	s	p	0	0	0	0	0	1	100	0	1	0		10	Staghorn City	15	HC2	s	p	0	0
377	Alive	Censored	Censored	Staghorn City	HC2	22	p	3a	xl	1.62155	115.09		Staghorn City	9a	HC2	m	e	0	0	0	0	0.0666667	0	5	3	3	1		10	Aruba's	8	HC4	s	p	0	0
377	Alive	Censored	Censored	Staghorn City	HC2	23	p	3a	s	-0.708167	-10.2315		Staghorn City	9a	HC2	m	p	0	0	0	0	0.1	0	0	2	2	1		10	Aruba's	9	HC6	s	p	0	0
261	missing	Complete	Complete	Staghorn City	HC2	24	e	15	s	NA	NA		Staghorn City	9a	HC2	l	n	0	0	0	0	0	0	40	2	2	1		10	Aruba's	10a	HC5	m	p	0	0
377	Alive	Censored	Censored	Staghorn City	HC2	25	e	9a	m	4.96106	116.921		Staghorn City	9a	HC2	l	p	0	0	0	0	0	0.5	0	1	2	0.5		10	South Commercial	10	HC8	s	p	0	0
377	Alive	Censored	Censored	Staghorn City	HC2	26	p	3a	xl	3.91424	295.86		Staghorn City	9a	HC2	xl	e	0	0	0	0	0	0	0	1	1	1		10	South Commercial	13	HC7	s	p	0	0
156	Dead	Complete	Censored	Staghorn City	HC2	27	n	3a	m	NA	NA		Staghorn City	9a	HC2	xl	n	0	0	0	0	0	0	1	1	1	1		11	Staghorn City	15	HC3	xl	e	10	0.1
377	Alive	Censored	Censored	Staghorn City	HC2	28	n	9a	l	0.180268	12.754		Staghorn City	9a	HC2	xl	p	0	0	0	0	0	0	0	1	1	1		11	Staghorn City	9a	HC1	l	e	0	0
377	Alive	Censored	Censored	Staghorn City	HC2	29	n	9a	s	7.32608	91.7849		Staghorn City	9a	HC3	s	e	0	0	0	0	0	0.5	0	1	2	0.5		11	Aruba's	8	HC5	l	e	0	0
377	Alive	Censored	Censored	Staghorn City	HC2	30	p	9a	m	6.86093	167.129		Staghorn City	9a	HC3	s	n	0	0	0	0	0	0	50	1	2	0.5		11	Aruba's	9	HC4	l	e	5	0.05
377	Alive	Censored	Censored	Staghorn City	HC2	31	e	15	l	4.00952	192.144		Staghorn City	9a	HC3	s	p	0	0	0	0	0	0	0	1	1	1		11	South Commercial	10	HC9	l	e	0	0
377	Alive	Censored	Censored	Staghorn City	HC2	32	p	9a	xl	3.59604	242.992		Staghorn City	9a	HC3	m	e	0	0	0	0	0	0	5	1	1	1		11	South Commercial	13	HC8	l	e	0	0
377	Alive	Censored	Censored	Staghorn City	HC2	33	n	15	s	9.97891	111.676		Staghorn City	9a	HC3	m	n	0	0	0	0	0.333333	0	10.3333	3	3	1		11	South Commercial	17	HC7	l	e	0	0
377	Alive	Censored	Censored	Staghorn City	HC2	34	n	9a	xl	3.24806	228.864		Staghorn City	9a	HC3	m	p	0	0	0	0	0	1	100	0	1	0		12	Staghorn City	15	HC2	l	e	0	0
261	missing	Complete	Complete	Staghorn City	HC2	35	e	3a	s	NA	NA		Staghorn City	9a	HC3	l	e	0	0	0	0	0.0769231	0.333333	0	2	3	0.666667		12	Staghorn City	3a	HC1	xl	e	0	0
377	Alive	Censored	Censored	Staghorn City	HC2	36	p	9a	m	6.23145	129.051		Staghorn City	9a	HC3	l	n	0	0	0	0	0	0	60	1	1	1		12	Staghorn City	9a	HC3	l	e	0	0
377	Alive	Censored	Censored	Staghorn City	HC2	37	n	15	xl	5.27844	348.648		Staghorn City	9a	HC3	l	p	0	0	0	0	0	0.5	0	1	2	0.5		12	Aruba's	8	HC4	m	e	0	0
261	missing	Complete	Complete	Staghorn City	HC2	38	p	15	m	NA	NA		Staghorn City	9a	HC3	xl	p	0	0	0	0	0	0.5	22.5	1	2	0.5		12	Aruba's	9	HC6	m	e	0	0
377	Alive	Censored	Censored	Staghorn City	HC2	39	e	9a	xl	2.55822	185.61		Aruba's	8	HC4	s	e	0	0	0	0	0.1	0	0	2	2	1		12	Aruba's	10a	HC5	l	e	0	0
377	Alive	Censored	Censored	Staghorn City	HC2	40	e	9a	s	10.9915	156.614		Aruba's	8	HC4	s	n	0	0	0	0	0.2	0	5	1	1	1		12	South Commercial	10	HC8	m	e	0	0
377	Alive	Censored	Censored	Staghorn City	HC2	41	n	15	l	7.95139	371.456		Aruba's	8	HC4	s	p	0	0	0	0	0.2	0	0	1	1	1		12	South Commercial	13	HC7	m	e	0	0
377	Alive	Censored	Censored	Staghorn City	HC2	42	p	15	xl	0.392062	25.592		Aruba's	8	HC4	m	e	0	0	0	0	0	0	0	1	1	1		12	South Commercial	17	HC9	m	e	60	0.6
377	missing	Complete	Complete	Staghorn City	HC2	43	p	15	s	NA	NA		Aruba's	8	HC4	m	n	0	0	0	0	0.2	0	0	3	3	1		13	Staghorn City	15	HC3	s	n	10	0.1
377	Alive	Censored	Censored	Staghorn City	HC2	44	e	15	xl	3.31537	282.933		Aruba's	8	HC4	m	p	0	0	0	0	0	0	0	2	2	1		13	Staghorn City	3a	HC2	s	n	0	0
156	missing	Complete	Complete	Staghorn City	HC2	45	e	15	s	NA	NA		Aruba's	8	HC4	l	e	0	0	0	0	0	0	0	1	1	1		13	Staghorn City	9a	HC1	s	n	0	0
261	missing	Complete	Complete	Staghorn City	HC3	1	e	3a	m	NA	NA		Aruba's	8	HC4	l	p	0	0	0	0	0	1	100	0	1	0		13	Aruba's	8	HC5	m	n	0	0
377	Alive	Censored	Censored	Staghorn City	HC3	2	n	3a	l	3.78745	213.997		Aruba's	8	HC4	xl	e	0	0	0	0	0	0.5	45	1	2	0.5		13	Aruba's	9	HC4	s	n	0	0
377	Alive	Censored	Censored	Staghorn City	HC3	3	p	3a	s	3.11596	49.039		Aruba's	8	HC4	xl	n	0	0	0	0	0.1	0	20	2	2	1		13	Aruba's	10a	HC6	s	n	0	0
377	Alive	Censored	Censored	Staghorn City	HC3	4	n	9a	m	-0.765939	-37.7376		Aruba's	8	HC4	xl	p	0	0	0	0	0	1	100	0	2	0		13	South Commercial	10	HC9	s	n	0	0
377	Alive	Censored	Censored	Staghorn City	HC3	5	e	3a	l	1.38648	70.0055		Aruba's	8	HC5	s	e	0	0	0	0	0	0	0	1	1	1		13	South Commercial	17	HC7	s	n	0	0
377	Alive	Censored	Censored	Staghorn City	HC3	6	n	3a	m	3.68812	89.5509		Aruba's	8	HC5	s	p	0	0	0	0	0.4	0	0	1	1	1		14	Staghorn City	15	HC1	xl	p	0	0
377	Alive	Censored	Censored	Staghorn City	HC3	7	e	3a	l	2.97962	173.244		Aruba's	8	HC5	m	e	0	0	0	0	0.2	0	20	1	1	1		14	Aruba's	8	HC6	l	p	0	0
377	Alive	Censored	Censored	Staghorn City	HC3	8	n	9a	m	2.07581	40.7793		Aruba's	8	HC5	m	n	0	0	0	0	0	0	0	2	2	1		14	Aruba's	9	HC5	l	p	5	0.05
261	missing	Complete	Complete	Staghorn City	HC3	9	e	9a	l	NA	NA		Aruba's	8	HC5	l	e	0	0	0	0	0	0	0	1	1	1		14	Aruba's	10a	HC4	xl	p	0	0
261	missing	Complete	Complete	Staghorn City	HC3	10	p	9a	m	NA	NA		Aruba's	8	HC5	l	p	0	0	0	0	0	0	0	1	1	1		14	South Commercial	10	HC7	l	p	0	0
377	Alive	Censored	Censored	Staghorn City	HC3	11	e	15	xl	2.48721	220.306		Aruba's	8	HC5	xl	n	0	0	0	0	0.4	0	10	1	1	1		14	South Commercial	13	HC9	xl	p	0	0
377	Alive	Censored	Censored	Staghorn City	HC3	12	e	9a	l	4.33718	179.233		Aruba's	8	HC5	xl	p	0	0	0	0	0	1	100	0	1	0		14	South Commercial	15	HC8	l	p	0	0
377	Alive	Censored	Censored	Staghorn City	HC3	13	n	15	s	6.46741	51.5195		Aruba's	8	HC6	s	e	0	0	0	0	0.125	0.5	0	1	2	0.5		15	Staghorn City	15	HC3	l	e	0	0
261	missing	Complete	Complete	Staghorn City	HC3	14	p	3a	xl	NA	NA		Aruba's	8	HC6	s	n	0	0	0	0	0.2	0	0	1	1	1		15	Staghorn City	3a	HC2	xl	e	0	0
377	Alive	Censored	Censored	Staghorn City	HC3	15	e	15	l	3.3857	164.664		Aruba's	8	HC6	s	p	0.142857	0	0	0	0.142857	0.5	100	0	2	0		15	Staghorn City	9a	HC1	m	e	0	0
377	Alive	Censored	Censored	Staghorn City	HC3	16	p	9a	xl	1.53354	105.635		Aruba's	8	HC6	m	e	0	0	0	0	0	0	5	1	1	1		15	Aruba's	8	HC5	m	e	20	0.2
261	missing	Complete	Complete	Staghorn City	HC3	17	p	3a	xl	NA	NA		Aruba's	8	HC6	m	n	0	0	0	0	0.05	0	0	4	4	1		15	Aruba's	9	HC4	m	e	20	0.2
377	Alive	Censored	Censored	Staghorn City	HC3	18	n	3a	l	0.033602	1.94562		Aruba's	8	HC6	m	p	0	0	0	0	0	0	2	1	1	1		15	Aruba's	10a	HC6	l	e	20	0.2
377	Alive	Censored	Censored	Staghorn City	HC3	19	p	9a	l	3.56032	148.585		Aruba's	8	HC6	l	e	0	0	0	0	0.2	0	0	1	1	1		15	South Commercial	10	HC9	m	e	0	0
377	Alive	Censored	Censored	Staghorn City	HC3	20	n	9a	l	1.07458	45.3366		Aruba's	8	HC6	l	p	0	0	0	0	0.0714286	0.333333	0	2	3	0.666667		15	South Commercial	13	HC8	s	e	0	0
377	Alive	Censored	Censored	Staghorn City	HC3	21	n	15	xl	2.20623	150.075		Aruba's	8	HC6	xl	e	0	0	0	0	0	0	5	2	2	1		15	South Commercial	17	HC7	m	e	0	0
377	Alive	Censored	Censored	Staghorn City	HC3	22	p	15	l	4.48127	205.774		Aruba's	9	HC4	s	e	0	0	0	0	0.2	0	0	1	1	1		16	Staghorn City	15	HC2	xl	p	0	0
261	missing	Complete	Complete	Staghorn City	HC3	23	p	15	s	NA	NA		Aruba's	9	HC4	s	n	0	0	0	0	0	0	0	1	1	1		16	Staghorn City	9a	HC3	xl	p	45	0.45
377	Alive	Censored	Censored	Staghorn City	HC3	24	e	9a	s	-0.294219	-2.69555		Aruba's	9	HC4	m	e	0	0	0	0	0	0	20	1	1	1		16	Aruba's	15	HC6	xl	p	0	0
377	Alive	Censored	Censored	Staghorn City	HC3	25	e	3a	l	4.61711	254.215		Aruba's	9	HC4	m	n	0	0	0	0	0	0	0	1	1	1		16	Aruba's	10a	HC5	xl	p	0	0
377	Alive	Censored	Censored	Staghorn City	HC3	26	p	15	xl	4.11606	305.2		Aruba's	9	HC4	m	p	0	0	0	0	0.2	0	0	1	1	1		16	South Commercial	2	HC9	xl	p	0	0
377	Alive	Censored	Censored	Staghorn City	HC3	27	n	15	l	2.14904	124.997		Aruba's	9	HC4	l	e	0	0	0	0	0	0	5	1	1	1		16	South Commercial	10	HC8	xl	p	25	0.25
377	Alive	Censored	Censored	Staghorn City	HC3	28	n	3a	m	0.920215	33.2066		Aruba's	9	HC4	l	n	0	0	0	0	0	0	0	1	1	1		16	South Commercial	13	HC7	m	p	0	0
377	Alive	Censored	Censored	Staghorn City	HC3	29	n	3a	s	6	31.0879		Aruba's	9	HC4	l	p	0	0	0	0	0	0	0	1	1	1		17	Staghorn City	15	HC1	xl	p	0	0
377	Alive	Censored	Censored	Staghorn City	HC3	30	p	3a	s	11.5084	175.446		Aruba's	9	HC4	xl	p	0	0	0	0	0.2	0	0	1	1	1		17	Staghorn City	9a	HC2	l	p	0	0
377	Alive	Censored	Censored	Staghorn City	HC3	31	e	9a	m	4.6035	147.411		Aruba's	9	HC5	s	e	0	0	0	0	0	0	0	1	1	1		17	Aruba's	8	HC6	l	p	0	0
377	Alive	Censored	Censored	Staghorn City	HC3	32	p	3a	xl	0.347943	29.2262		Aruba's	9	HC5	s	n	0	0	0	0	0.1	0	5	2	2	1		17	Aruba's	9	HC5	m	p	0	0
377	Alive	Censored	Censored	Staghorn City	HC3	33	n	9a	s	9.10661	95.4192		Aruba's	9	HC5	s	p	0	0	0	0	0.25	0.5	0	1	2	0.5		17	Aruba's	10a	HC4	l	p	0	0
377	Alive	Censored	Censored	Staghorn City	HC3	34	n	3a	l	2.41959	130.975		Aruba's	9	HC5	m	e	0	0	0	0	0	0.5	0	2	4	0.5		17	South Commercial	10	HC7	m	p	0	0
377	missing	Complete	Complete	Staghorn City	HC3	35	e	15	s	NA	NA		Aruba's	9	HC5	m	n	0	0	0	0	0.222222	0.5	25	1	2	0.5		17	South Commercial	13	HC9	l	p	0	0
377	Alive	Censored	Censored	Staghorn City	HC3	36	p	3a	xl	0.901136	81.9782		Aruba's	9	HC5	m	p	0	0	0	0	0	0	0	1	1	1		17	South Commercial	17	HC8	m	p	0	0
377	Alive	Censored	Censored	Staghorn City	HC3	37	n	9a	m	4.95553	158.969		Aruba's	9	HC5	l	e	0	0	0	0	0	0	30	1	1	1		18	Staghorn City	15	HC1	xl	n	0	0
261	missing	Complete	Complete	Staghorn City	HC3	38	p	9a	l	NA	NA		Aruba's	9	HC5	l	n	0	0	0	0	0	0	0	2	2	1		18	Staghorn City	3a	HC3	l	n	0	0
377	Alive	Censored	Censored	Staghorn City	HC3	39	e	3a	xl	3.39288	297.999		Aruba's	9	HC5	l	p	0	0	0	0	0.0666667	0	1.66667	3	3	1		18	Staghorn City	9a	HC2	l	n	0	0
156	Dead	Complete	Censored	Staghorn City	HC3	40	e	3a	s	NA	NA		Aruba's	9	HC6	s	e	0	0	0	0	0.2	0	0	2	2	1		18	Aruba's	9	HC5	l	n	0	0
156	Dead	Complete	Censored	Staghorn City	HC3	41	n	9a	s	NA	NA		Aruba's	9	HC6	s	n	0	0	0	0	0.157895	0.25	0	3	4	0.75		18	Aruba's	9	HC6	s	n	0	0
261	missing	Complete	Complete	Staghorn City	HC3	42	p	9a	xl	NA	NA		Aruba's	9	HC6	s	p	0	0	0	0	0.125	0.5	0	1	2	0.5		18	Aruba's	10a	HC4	xl	n	35	0.35
377	Alive	Censored	Censored	Staghorn City	HC3	43	p	9a	s	7.05642	64.2788		Aruba's	9	HC6	m	e	0	0.1	0.111111	0.0457575	0.1	0	25	2	2	1		18	South Commercial	10	HC7	xl	n	0	0
377	Alive	Censored	Censored	Staghorn City	HC3	44	e	9a	l	2.54262	134.541		Aruba's	9	HC6	m	n	0	0	0	0	0	1	100	0	1	0		18	South Commercial	15	HC8	m	n	65	0.65
377	missing	Complete	Complete	Staghorn City	HC3	45	e	9a	s	NA	NA		Aruba's	9	HC6	m	p	0	0	0.333333	0.124939	0	1	100	0	1	0		19	Staghorn City	15	HC2	m	p	10	0.1
377	Alive	Censored	Censored	Aruba's	HC4	1	e	10a	s	-0.787064	-12.1887		Aruba's	9	HC6	l	e	0	0	0	0	0.4	0	0	1	1	1		19	Staghorn City	3a	HC1	xl	p	0	0
261	missing	Complete	Complete	Aruba's	HC4	2	n	10a	l	NA	NA		Aruba's	9	HC6	l	p	0	0	0	0	0	0	100	0	1	0		19	Staghorn City	9a	HC3	l	p	0	0
377	Alive	Censored	Censored	Aruba's	HC4	3	p	10a	m	1.76761	42.3631		Aruba's	15	HC6	xl	e	0	0	0	0	0.2	0	0	1	1	1		19	Aruba's	8	HC4	m	p	0	0
377	Alive	Censored	Censored	Aruba's	HC4	4	n	8	m	1.1752	31.4068		Aruba's	15	HC6	xl	n	0	0	0.222222	0.0871502	0.222222	0.5	2.5	1	2	0.5		19	Aruba's	10a	HC5	l	p	0	0
377	Alive	Censored	Censored	Aruba's	HC4	5	e	10a	xl	NA	NA		Aruba's	15	HC6	xl	p	0	0	0.1	0.0413927	0	0	0	2	2	1		19	South Commercial	10	HC8	m	p	1	0.01
156	Dead	Complete	Censored	Aruba's	HC4	6	n	10a	m	NA	NA		Aruba's	10a	HC4	s	e	0	0	0.125	0.0511525	0.125	0.5	0	1	2	0.5		19	South Commercial	13	HC7	m	p	0	0
377	Alive	Censored	Censored	Aruba's	HC4	7	e	10a	l	0.12376	6.67593		Aruba's	10a	HC4	s	p	0	0	0	0	0	1	100	0	1	0		19	South Commercial	17	HC9	m	p	0	0
377	Alive	Censored	Censored	Aruba's	HC4	8	n	8	m	-0.913406	-51.1682		Aruba's	10a	HC4	m	n	0	0	0	0	0	0	50	1	2	0.5		20	Staghorn City	15	HC2	xl	n	0	0
377	Alive	Censored	Censored	Aruba's	HC4	9	e	8	xl	-0.679525	-71.6889		Aruba's	10a	HC4	m	p	0	0	0	0	0	0	0	1	1	1		20	Staghorn City	3a	HC1	xl	n	0	0
377	Alive	Censored	Censored	Aruba's	HC4	10	p	8	s	3.40089	52.2747		Aruba's	10a	HC4	l	e	0.125	0	0	0	0	0	72.5	1	2	0.5		20	Staghorn City	9a	HC3	l	n	60	0.6
377	Alive	Censored	Censored	Aruba's	HC4	11	e	9	l	1.63193	95.3563		Aruba's	10a	HC4	l	n	0	0	0	0	0	0.5	0.5	1	2	0.5		20	Aruba's	8	HC4	xl	n	40	0.4
377	Alive	Censored	Censored	Aruba's	HC4	12	e	8	m	1.4748	54.0158		Aruba's	10a	HC4	l	p	0	0.1	0	0	0	0	0	2	2	1		20	Aruba's	10a	HC5	xl	n	5	0.05
377	Alive	Censored	Censored	Aruba's	HC4	13	n	9	s	5.13584	35.0945		Aruba's	10a	HC4	xl	e	0	0	0.1	0.0413927	0	0	67	2	2	1		20	South Commercial	2	HC9	xl	n	5	0.05
377	Alive	Censored	Censored	Aruba's	HC4	14	p	10a	xl	1.2934	124.955		Aruba's	10a	HC4	xl	n	0.1	0	0.1	0.0413927	0.1	0	57.5	2	2	1		20	South Commercial	10	HC8	l	n	0	0
377	Alive	Censored	Censored	Aruba's	HC4	15	e	9	m	NA	NA		Aruba's	10a	HC4	xl	p	0.1	0	0	0	0	0	5	2	2	1		20	South Commercial	13	HC7	l	n	0	0
156	missing	Complete	Complete	Aruba's	HC4	16	p	8	xl	NA	NA		Aruba's	10a	HC5	s	e	0	0	0	0	0	1	100	0	1	0		21	Staghorn City	15	HC3	xl	n	30	0.3
377	Alive	Censored	Censored	Aruba's	HC4	17	p	10a	l	2.02211	94.9839		Aruba's	10a	HC5	s	p	0	0	0.2	0.0791812	0	0	10	1	1	1		21	Staghorn City	3a	HC2	l	n	0	0
377	Alive	Censored	Censored	Aruba's	HC4	18	n	10a	xl	1.70878	167.334		Aruba's	10a	HC5	m	e	0	0	0	0	0	0	0	1	1	1		21	Staghorn City	9a	HC1	l	n	0	0
377	Alive	Censored	Censored	Aruba's	HC4	19	p	8	m	-0.0710652	-2.34418		Aruba's	10a	HC5	m	n	0	0	0.111111	0.0457575	0.1	0	25	2	2	1		21	Aruba's	8	HC5	xl	n	10	0.1
377	Alive	Censored	Censored	Aruba's	HC4	20	n	8	xl	0.249029	31.5966		Aruba's	10a	HC5	m	p	0	0	0	0	0.2	0	0	1	1	1		21	Aruba's	9	HC4	l	n	0	0
377	Alive	Censored	Censored	Aruba's	HC4	21	n	9	l	2.45309	152.356		Aruba's	10a	HC5	l	e	0	0	0	0	0.1	0	0	2	2	1		21	South Commercial	10	HC9	xl	n	0	0
377	Alive	Censored	Censored	Aruba's	HC4	22	p	9	l	2.98014	165.225		Aruba's	10a	HC5	l	n	0	0	0	0	0	0.5	0	1	2	0.5		21	South Commercial	13	HC8	l	n	0	0
377	Alive	Censored	Censored	Aruba's	HC4	23	p	9	m	-0.495485	-8.92047		Aruba's	10a	HC5	l	p	0.1	0	0	0	0.1	0	25	2	2	1		21	South Commercial	17	HC7	xl	n	0	0
377	Alive	Censored	Censored	Aruba's	HC4	24	e	8	s	3.99411	46.27		Aruba's	10a	HC5	xl	e	0	0	0	0	0	0.5	0	1	2	0.5		22	Staghorn City	15	HC3	l	p	1	0.01
261	Dead	Complete	Censored	Aruba's	HC4	25	e	10a	l	NA	NA		Aruba's	10a	HC5	xl	n	0	0	0	0	0	0.5	2.5	1	2	0.5		22	Staghorn City	3a	HC2	xl	p	0	0
377	Alive	Censored	Censored	Aruba's	HC4	26	p	9	xl	2.07532	133.367		Aruba's	10a	HC5	xl	p	0	0	0.1	0.0413927	0.1	0	2.5	2	2	1		22	Staghorn City	9a	HC1	m	p	0	0
377	Alive	Censored	Censored	Aruba's	HC4	27	n	9	m	-0.00501453	-0.361853		Aruba's	10a	HC6	s	e	0	0	0	0	0.2	0	0	1	1	1		22	Aruba's	8	HC5	l	p	0	0
377	Alive	Censored	Censored	Aruba's	HC4	28	n	10a	l	1.24694	58.2584		Aruba's	10a	HC6	s	n	0	0	0	0	0	0	0	1	1	1		22	Aruba's	9	HC4	l	p	0	0
377	Alive	Censored	Censored	Aruba's	HC4	29	n	10a	m	-0.0880576	-1.98757		Aruba's	10a	HC6	s	p	0	0	0	0	0	1	100	0	1	0		22	Aruba's	10a	HC6	l	p	0	0
261	missing	Complete	Complete	Aruba's	HC4	30	p	10a	s	NA	NA		Aruba's	10a	HC6	m	e	0	0	0	0	0	1	100	0	1	0		22	South Commercial	10	HC9	l	p	0	0
377	Alive	Censored	Censored	Aruba's	HC4	31	e	8	l	1.74477	69.9793		Aruba's	10a	HC6	m	n	0	0	0	0	0.2	0	0	1	1	1		22	South Commercial	17	HC7	m	p	0	0
377	Alive	Censored	Censored	Aruba's	HC4	32	p	10a	xl	1.6297	161.009		Aruba's	10a	HC6	l	e	0	0	0	0	0.2	0	20	1	1	1		23	Staghorn City	3a	HC2	s	p	0	0
377	Alive	Censored	Censored	Aruba's	HC4	33	n	8	s	4.50931	55.8565		Aruba's	10a	HC6	l	p	0	0	0	0	0.1	0	0	2	2	1		23	Staghorn City	9a	HC1	m	p	0	0
377	Alive	Censored	Censored	Aruba's	HC4	34	n	10a	xl	1.57819	111.996		Aruba's	10a	HC6	xl	n	0	0	0.333333	0.124939	0	0	100	0	1	0		23	Aruba's	8	HC5	s	p	0	0
377	Alive	Censored	Censored	Aruba's	HC4	35	e	9	s	-0.839345	-14.5213		South Commercial	2	HC9	xl	e	0	0	0	0	0	0	0	2	2	1		23	Aruba's	9	HC4	m	p	0	0
377	Alive	Censored	Censored	Aruba's	HC4	36	p	10a	l	5.82442	237.119		South Commercial	2	HC9	xl	n	0	0.2	0	0	0.4	0	5	1	1	1		23	South Commercial	10	HC9	s	p	0	0
377	Alive	Censored	Censored	Aruba's	HC4	37	n	8	xl	1.32271	85.7435		South Commercial	2	HC9	xl	p	0	0	0	0	0.3	0	0	2	2	1		23	South Commercial	13	HC8	s	p	0	0
156	missing	Complete	Complete	Aruba's	HC4	38	p	8	l	NA	NA		South Commercial	10	HC7	s	e	0	0	0	0	0.3	0	0	2	2	1		24	Staghorn City	9a	HC3	s	e	0	0
377	Alive	Censored	Censored	Aruba's	HC4	39	e	10a	xl	1.61565	106.563		South Commercial	10	HC7	s	n	0	0	0.111111	0.0457575	0.111111	0	50	1	2	0.5		24	Aruba's	8	HC4	s	e	0	0
261	missing	Complete	Complete	Aruba's	HC4	40	e	10a	s	NA	NA		South Commercial	10	HC7	s	p	0	0	0	0	0	1	100	0	2	0		24	Aruba's	9	HC6	s	e	0	0
377	Alive	Censored	Censored	Aruba's	HC4	41	n	8	m	-0.0332308	-0.566379		South Commercial	10	HC7	m	e	0	0	0	0	0	1	100	0	1	0		24	Aruba's	10a	HC5	m	e	0	0
261	missing	Complete	Complete	Aruba's	HC4	42	p	8	xl	NA	NA		South Commercial	10	HC7	m	n	0	0	0	0	0.2	0	0	1	1	1		25	Staghorn City	15	HC1	l	e	0	0
377	Alive	Censored	Censored	Aruba's	HC4	43	p	8	m	4.36064	99.1111		South Commercial	10	HC7	m	p	0	0	0.2	0.0791812	0	0	0	2	2	1		25	Staghorn City	3a	HC3	l	e	1	0.01
377	missing	Complete	Complete	Aruba's	HC4	44	e	8	xl	NA	NA		South Commercial	10	HC7	l	e	0.2	0	0	0	0	0	40	1	1	1		25	Staghorn City	9a	HC2	m	e	0	0
377	Alive	Censored	Censored	Aruba's	HC4	45	e	8	s	5.42651	55.18		South Commercial	10	HC7	l	n	0	0	0	0	0	0	0	1	1	1		25	Aruba's	8	HC6	l	e	0	0
377	Alive	Censored	Censored	Aruba's	HC5	1	e	9	s	1.99432	25.7598		South Commercial	10	HC7	l	p	0	0	0	0	0	0	0	1	1	1		25	Aruba's	9	HC5	m	e	0	0
377	Alive	Censored	Censored	Aruba's	HC5	2	n	9	m	-0.883739	-17.8986		South Commercial	10	HC7	xl	e	0	0	0	0	0.1	0	0	2	2	1		25	South Commercial	13	HC9	m	e	0	0
261	missing	Complete	Complete	Aruba's	HC5	3	p	9	s	NA	NA		South Commercial	10	HC7	xl	n	0	0	0	0	0	0	0	2	2	1		25	South Commercial	17	HC8	m	e	45	0.45
377	missing	Complete	Complete	Aruba's	HC5	4	n	10a	l	NA	NA		South Commercial	10	HC7	xl	p	0	0	0	0	0	1	100	0	1	0		26	Staghorn City	15	HC3	xl	p	0	0
377	Alive	Censored	Censored	Aruba's	HC5	5	e	9	l	1.16303	67.6404		South Commercial	10	HC8	s	e	0	0	0	0	0	1	100	0	1	0		26	Staghorn City	3a	HC2	xl	p	0	0
377	Alive	Censored	Censored	Aruba's	HC5	6	n	9	s	-0.339578	-2.28125		South Commercial	10	HC8	s	n	0	0	0	0	0.375	0	50	1	2	0.5		26	Staghorn City	9a	HC1	xl	p	30	0.3
156	missing	Complete	Complete	Aruba's	HC5	7	e	9	m	NA	NA		South Commercial	10	HC8	s	p	0	0	0	0	0	0	50	1	2	0.5		26	Aruba's	9	HC4	xl	p	0	0
377	Alive	Censored	Censored	Aruba's	HC5	8	n	10a	m	-0.908677	-18.8374		South Commercial	10	HC8	m	e	0	0	0	0	0.1	0	42.5	2	2	1		26	Aruba's	10a	HC6	l	p	0	0
377	Alive	Censored	Censored	Aruba's	HC5	9	e	10a	xl	-0.324712	-25.4136		South Commercial	10	HC8	m	p	0	0.142857	0	0	0	0.5	0.5	1	2	0.5		26	South Commercial	10	HC9	xl	p	0	0
377	Alive	Censored	Censored	Aruba's	HC5	10	p	10a	m	8.41525	202.565		South Commercial	10	HC8	l	e	0	0	0	0	0.1	0	0	2	2	1		26	South Commercial	13	HC8	l	p	0	0
377	Alive	Censored	Censored	Aruba's	HC5	11	e	8	l	1.70616	86.5407		South Commercial	10	HC8	l	n	0	0	0	0	0.133333	0	0	3	3	1		26	South Commercial	17	HC7	xl	p	0	0
377	Alive	Censored	Censored	Aruba's	HC5	12	e	10a	l	3.23533	155.01		South Commercial	10	HC8	xl	e	0	0	0	0	0.333333	0	100	0	1	0		27	Staghorn City	15	HC3	l	n	25	0.25
377	Alive	Censored	Censored	Aruba's	HC5	13	n	8	m	1.64641	28.985		South Commercial	10	HC8	xl	n	0	0	0	0	0	0	100	0	1	0		27	Staghorn City	9a	HC1	m	n	0	0
377	Alive	Censored	Censored	Aruba's	HC5	14	p	9	l	1.48615	61.8822		South Commercial	10	HC8	xl	p	0	0.2	0	0	0.1	0	13	2	2	1		27	Aruba's	8	HC5	m	n	0	0
377	Alive	Censored	Censored	Aruba's	HC5	15	e	8	m	0.830103	27.8522		South Commercial	10	HC9	s	e	0	0	0	0	0.6	0	0	1	1	1		27	Aruba's	9	HC4	m	n	0	0
377	Alive	Censored	Censored	Aruba's	HC5	16	p	10a	xl	1.87314	135.894		South Commercial	10	HC9	s	n	0	0	0	0	0	0	0	1	1	1		27	Aruba's	10a	HC6	m	n	0	0
377	Alive	Censored	Censored	Aruba's	HC5	17	p	9	m	-0.0340256	-1.11703		South Commercial	10	HC9	s	p	0	0	0	0	0	0	0	1	1	1		27	South Commercial	10	HC9	m	n	0	0
377	Alive	Censored	Censored	Aruba's	HC5	18	n	9	l	4.08861	198.658		South Commercial	10	HC9	m	e	0	0	0	0	0.2	0	0	1	1	1		27	South Commercial	17	HC7	m	n	0	0
377	Alive	Censored	Censored	Aruba's	HC5	19	p	10a	l	1.49651	70.9233		South Commercial	10	HC9	m	n	0	0	0	0	0	0	0	1	1	1		28	Staghorn City	3a	HC3	m	n	55	0.55
377	Alive	Censored	Censored	Aruba's	HC5	20	n	10a	xl	2.93394	241.765		South Commercial	10	HC9	l	e	0	0	0	0	0	0	0	1	1	1		28	Staghorn City	9a	HC2	l	n	80	0.8
377	Alive	Censored	Censored	Aruba's	HC5	21	n	8	xl	2.43799	272.906		South Commercial	10	HC9	l	p	0	0	0	0	0	0	0	1	1	1		28	Aruba's	8	HC6	m	n	0	0
377	Alive	Censored	Censored	Aruba's	HC5	22	p	8	l	4.4868	181.792		South Commercial	10	HC9	xl	n	0	0	0	0	0.4	0	0	1	1	1		28	Aruba's	10a	HC4	l	n	1	0.01
377	Alive	Censored	Censored	Aruba's	HC5	23	p	8	s	-0.241839	-3.18588		South Commercial	10	HC9	xl	p	0	0	0	0	0	0	0	1	1	1		28	South Commercial	10	HC7	m	n	0	0
377	Alive	Censored	Censored	Aruba's	HC5	24	e	10a	m	5.01967	179.348		South Commercial	13	HC7	s	e	0	0	0	0	0	1	100	0	1	0		28	South Commercial	13	HC9	s	n	0	0
377	Alive	Censored	Censored	Aruba's	HC5	25	e	9	m	1.82258	56.4596		South Commercial	13	HC7	s	n	0	0	0	0	0.0909091	0	33.3333	2	3	0.666667		29	Staghorn City	15	HC1	s	n	0	0
261	missing	Complete	Complete	Aruba's	HC5	26	p	8	xl	NA	NA		South Commercial	13	HC7	s	p	0	0	0	0	0	0.5	0	1	2	0.5		29	Staghorn City	3a	HC3	s	n	1	0.01
377	Alive	Censored	Censored	Aruba's	HC5	27	n	8	m	4.64056	110.633		South Commercial	13	HC7	m	e	0	0	0	0	0	0	33.3333	2	3	0.666667		29	Staghorn City	9a	HC2	s	n	0	0
377	missing	Complete	Complete	Aruba's	HC5	28	n	9	m	NA	NA		South Commercial	13	HC7	m	n	0	0	0	0	0.2	0	0	1	1	1		29	Aruba's	8	HC6	m	n	0	0
377	Alive	Censored	Censored	Aruba's	HC5	29	n	9	s	14.483	102.688		South Commercial	13	HC7	m	p	0	0	0	0	0	0	0	2	2	1		29	Aruba's	9	HC5	s	n	0	0
377	Alive	Censored	Censored	Aruba's	HC5	30	p	9	s	5.12796	76.0784		South Commercial	13	HC7	l	e	0	0	0	0	0	0	0	1	1	1		29	Aruba's	10a	HC4	m	n	0	0
156	missing	Complete	Complete	Aruba's	HC5	31	e	10a	xl	NA	NA		South Commercial	13	HC7	l	n	0	0	0	0	0.1	0	0	2	2	1		29	South Commercial	13	HC9	s	n	0	0
377	Alive	Censored	Censored	Aruba's	HC5	32	p	9	l	-0.157105	-9.11976		South Commercial	13	HC7	l	p	0	0	0	0	0	0	0	1	1	1		29	South Commercial	17	HC8	s	n	0	0
377	Alive	Censored	Censored	Aruba's	HC5	33	n	10a	m	3.31911	64.8557		South Commercial	13	HC7	xl	e	0	0	0	0	0	0	0	1	1	1		30	Staghorn City	15	HC1	s	p	0	0
377	Alive	Censored	Censored	Aruba's	HC5	34	n	9	l	2.17025	115.384		South Commercial	13	HC7	xl	p	0	0	0	0	0	0	0	1	1	1		30	Staghorn City	3a	HC3	s	p	0	0
377	Alive	Censored	Censored	Aruba's	HC5	35	e	8	s	5.52877	42.8246		South Commercial	13	HC8	s	e	0	0	0	0	0	0	50	1	2	0.5		30	Staghorn City	9a	HC2	m	p	0	0
377	Alive	Censored	Censored	Aruba's	HC5	36	p	9	l	3.10567	132.706		South Commercial	13	HC8	s	n	0.142857	0	0	0	0	0	100	0	2	0		30	Aruba's	9	HC5	s	p	0	0
377	missing	Complete	Complete	Aruba's	HC5	37	n	10a	xl	NA	NA		South Commercial	13	HC8	s	p	0	0	0	0	0	0	0	1	1	1		30	South Commercial	17	HC8	s	p	0	0
377	Alive	Censored	Censored	Aruba's	HC5	38	p	10a	l	1.38411	66.8957		South Commercial	13	HC8	m	p	0.333333	0	0	0	0	0	100	0	1	0		31	Staghorn City	15	HC2	l	e	0	0
377	Alive	Censored	Censored	Aruba's	HC5	39	e	9	m	3.55534	106.296		South Commercial	13	HC8	l	e	0	0.2	0	0	0	0	0	1	1	1		31	Staghorn City	3a	HC1	xl	e	0	0
377	missing	Complete	Complete	Aruba's	HC5	40	e	9	m	NA	NA		South Commercial	13	HC8	l	n	0	0	0	0	0	0	0	1	1	1		31	Staghorn City	9a	HC3	m	e	5	0.05
377	Alive	Censored	Censored	Aruba's	HC5	41	n	10a	l	4.2722	212.439		South Commercial	13	HC8	l	p	0	0	0	0	0	0	0	1	1	1		31	Aruba's	8	HC4	l	e	0	0
377	Alive	Censored	Censored	Aruba's	HC5	42	p	10a	xl	2.0996	151.564		South Commercial	13	HC9	s	e	0	0	0	0	0	0	55	1	2	0.5		31	Aruba's	9	HC6	m	e	50	0.5
377	Alive	Censored	Censored	Aruba's	HC5	43	p	10a	s	NA	NA		South Commercial	13	HC9	s	n	0	0	0	0	0	0	0	4	4	1		31	South Commercial	10	HC8	l	e	0	0
377	Alive	Censored	Censored	Aruba's	HC5	44	e	10a	l	3.76107	236.018		South Commercial	13	HC9	s	p	0	0	0	0	0	1	100	0	2	0		32	Staghorn City	15	HC1	xl	p	1	0.01
261	missing	Complete	Complete	Aruba's	HC5	45	e	10a	s	NA	NA		South Commercial	13	HC9	m	e	0	0	0	0	0	0	0	2	2	1		32	Staghorn City	3a	HC3	xl	p	1	0.01
261	missing	Complete	Complete	Aruba's	HC6	1	e	8	s	NA	NA		South Commercial	13	HC9	m	p	0	0	0	0	0	0	0	1	1	1		32	Staghorn City	9a	HC2	xl	p	0	0
377	Alive	Censored	Censored	Aruba's	HC6	2	n	8	m	3.61662	101.812		South Commercial	13	HC9	l	n	0	0	0	0	0	0	100	0	1	0		32	Aruba's	9	HC5	l	p	0	0
261	missing	Complete	Complete	Aruba's	HC6	3	p	8	s	NA	NA		South Commercial	13	HC9	l	p	0	0	0	0	0.1	0	0	2	2	1		32	Aruba's	10a	HC4	xl	p	10	0.1
377	missing	Complete	Complete	Aruba's	HC6	4	n	9	s	NA	NA		South Commercial	13	HC9	xl	e	0	0	0	0	0.2	0	2.5	2	2	1		32	South Commercial	13	HC9	l	p	0	0
377	Alive	Censored	Censored	Aruba's	HC6	5	e	8	xl	1.61229	187.005		South Commercial	13	HC9	xl	n	0	0	0	0	0.2	0	0	1	1	1		32	South Commercial	15	HC8	m	p	0	0
377	Alive	Censored	Censored	Aruba's	HC6	6	n	8	s	4.57157	70.509		South Commercial	13	HC9	xl	p	0	0	0	0	0	0	0	1	1	1		33	Staghorn City	15	HC2	s	n	0	0
377	Alive	Censored	Censored	Aruba's	HC6	7	e	8	m	0.813915	25.6444		South Commercial	15	HC8	m	n	0	0	0	0	0	0	65	1	1	1		33	Staghorn City	3a	HC1	m	n	0	0
377	Alive	Censored	Censored	Aruba's	HC6	8	n	9	s	5.96075	18.3182		South Commercial	15	HC8	m	p	0	0	0	0	0	0	0	1	1	1		33	Staghorn City	9a	HC3	s	n	0	0
377	Alive	Censored	Censored	Aruba's	HC6	9	e	15	xl	0.775037	80.7248		South Commercial	15	HC8	l	e	0	0	0.2	0.0791812	0.2	0	0	1	1	1		33	Aruba's	8	HC4	s	n	5	0.05
377	Alive	Censored	Censored	Aruba's	HC6	10	p	9	s	1.19778	15.8796		South Commercial	15	HC8	l	n	0	0	0	0	0.333333	1	100	0	1	0		33	Aruba's	9	HC6	s	n	0	0
156	missing	Complete	Complete	Aruba's	HC6	11	e	10a	m	NA	NA		South Commercial	15	HC8	l	p	0	0	0	0	0.2	0	0	1	1	1		33	Aruba's	10a	HC5	m	n	0	0
377	Alive	Censored	Censored	Aruba's	HC6	12	e	9	m	2.55298	46.8731		South Commercial	15	HC9	xl	n	0	0	0	0	0	0	0	1	1	1		33	South Commercial	13	HC7	s	n	0	0
377	Alive	Censored	Censored	Aruba's	HC6	13	n	10a	s	10.6526	60.9487		South Commercial	17	HC7	s	e	0	0	0	0	0	0	100	0	1	0		33	South Commercial	17	HC9	s	n	0	0
377	Alive	Censored	Censored	Aruba's	HC6	14	p	8	l	-0.571047	-16.8393		South Commercial	17	HC7	s	n	0	0	0	0	0	0	0	1	1	1		34	Staghorn City	15	HC1	xl	n	10	0.1
377	Alive	Censored	Censored	Aruba's	HC6	15	e	10a	l	1.39983	60.461		South Commercial	17	HC7	s	p	0	0	0	0	0	1	100	0	1	0		34	Staghorn City	3a	HC3	l	n	5	0.05
377	Alive	Censored	Censored	Aruba's	HC6	16	p	15	xl	2.02041	189.501		South Commercial	17	HC7	m	e	0	0	0	0	0.2	0	0	1	1	1		34	Staghorn City	9a	HC2	xl	n	1	0.01
377	Alive	Censored	Censored	Aruba's	HC6	17	p	8	l	0.808459	42.3001		South Commercial	17	HC7	m	n	0	0	0	0	0.2	0	0	1	1	1		34	Aruba's	8	HC6	m	n	0	0
377	Alive	Censored	Censored	Aruba's	HC6	18	n	9	s	6.45953	97.0869		South Commercial	17	HC7	m	p	0	0	0	0	0	0	0	1	1	1		34	Aruba's	9	HC5	l	n	0	0
29	Dead	Complete	Censored	Aruba's	HC6	19	p	9	l	NA	NA		South Commercial	17	HC7	l	e	0	0	0	0	0	0	0	1	1	1		34	Aruba's	10a	HC4	xl	n	80	0.8
377	missing	Complete	Complete	Aruba's	HC6	20	n	15	xl	NA	NA		South Commercial	17	HC7	xl	n	0	0	0	0	0.2	0	0	1	1	1		34	South Commercial	10	HC7	xl	n	0	0
261	Dead	Complete	Censored	Aruba's	HC6	21	n	10a	xl	NA	NA		South Commercial	17	HC7	xl	p	0	0	0	0	0	0	0	1	1	1		34	South Commercial	13	HC9	xl	n	0	0
377	Alive	Censored	Censored	Aruba's	HC6	22	p	10a	l	3.14302	128.846		South Commercial	17	HC8	s	e	0	0	0	0	0.3	0	0	2	2	1		35	Aruba's	8	HC5	s	e	0	0
261	missing	Complete	Complete	Aruba's	HC6	23	p	10a	s	NA	NA		South Commercial	17	HC8	s	n	0.111111	0	0	0	0	0	50	1	2	0.5		35	Aruba's	9	HC4	s	e	0	0
377	Alive	Censored	Censored	Aruba's	HC6	24	e	9	s	6.88249	48.2209		South Commercial	17	HC8	s	p	0	0	0	0	0	0	0	1	1	1		35	Aruba's	10a	HC6	s	e	0	0
377	Alive	Censored	Censored	Aruba's	HC6	25	e	8	l	4.53636	125.967		South Commercial	17	HC8	m	e	0	0	0	0	0.1	0	22.5	2	2	1		35	South Commercial	10	HC9	s	e	0	0
377	Alive	Censored	Censored	Aruba's	HC6	26	p	10a	l	3.65247	149.807		South Commercial	17	HC8	m	n	0	0	0	0	0	0.5	0	1	2	0.5		36	Staghorn City	15	HC1	l	p	0	0
377	Alive	Censored	Censored	Aruba's	HC6	27	n	10a	m	4.42168	151.003		South Commercial	17	HC8	m	p	0	0	0	0	0.111111	0.333333	33.3333	1	3	0.333333		36	Staghorn City	3a	HC3	xl	p	40	0.4
377	Alive	Censored	Censored	Aruba's	HC6	28	n	8	m	4.62983	118.656		South Commercial	17	HC8	xl	e	0	0	0	0	0	0	0	1	1	1		36	Staghorn City	9a	HC2	m	p	0	0
377	Alive	Censored	Censored	Aruba's	HC6	29	n	8	m	-0.378987	-7.85065		South Commercial	17	HC9	s	e	0	0	0	0	0	1	100	0	2	0		36	Aruba's	8	HC6	m	p	2	0.02
377	Dead	Complete	Censored	Aruba's	HC6	30	p	8	s	NA	NA		South Commercial	17	HC9	s	n	0	0	0	0	0.133333	0	30	3	3	1		36	Aruba's	9	HC5	l	p	0	0
377	Alive	Censored	Censored	Aruba's	HC6	31	e	9	m	2.51929	62.3332		South Commercial	17	HC9	s	p	0	0	0	0	0	0	50	1	2	0.5		36	Aruba's	10a	HC4	l	p	0	0
377	missing	Complete	Complete	Aruba's	HC6	32	p	8	l	NA	NA		South Commercial	17	HC9	m	e	0.125	0	0	0	0.125	0.5	30	1	2	0.5		36	South Commercial	10	HC7	m	p	0	0
377	Alive	Censored	Censored	Aruba's	HC6	33	n	9	s	12.9881	63.0726		South Commercial	17	HC9	m	n	0	0	0	0	0	1	100	0	1	0		36	South Commercial	13	HC9	m	p	0	0
377	Alive	Censored	Censored	Aruba's	HC6	34	n	8	m	3.30685	114.7		South Commercial	17	HC9	m	p	0	0	0	0	0.1	0	0	2	2	1		37	Staghorn City	15	HC2	xl	n	5	0.05
377	Alive	Censored	Censored	Aruba's	HC6	35	e	10a	s	2.12137	6.50812																		37	Staghorn City	3a	HC1	xl	n	0	0
377	Alive	Censored	Censored	Aruba's	HC6	36	p	8	m	2.11086	69.3972																		37	Staghorn City	9a	HC3	m	n	1	0.01
377	Alive	Censored	Censored	Aruba's	HC6	37	n	15	xl	0.993753	112.615																		37	Aruba's	8	HC4	xl	n	0	0
377	missing	Complete	Complete	Aruba's	HC6	38	p	9	m	NA	NA																		37	Aruba's	15	HC6	xl	n	5	0.05
377	Alive	Censored	Censored	Aruba's	HC6	39	e	8	xl	2.97042	164.858																		37	South Commercial	13	HC7	l	n	0	0
377	Alive	Censored	Censored	Aruba's	HC6	40	e	8	s	0.109659	0.791882																		37	South Commercial	15	HC9	xl	n	0	0
261	missing	Complete	Complete	Aruba's	HC6	41	n	9	m	NA	NA																		38	Aruba's	10a	HC5	l	p	50	0.5
377	Alive	Censored	Censored	Aruba's	HC6	42	p	15	xl	2.82312	269.025																		38	South Commercial	13	HC7	l	p	0	0
261	missing	Complete	Complete	Aruba's	HC6	43	p	9	s	NA	NA																		38	South Commercial	17	HC9	m	p	0	0
377	Alive	Censored	Censored	Aruba's	HC6	44	e	9	l	1.71559	80.9188																		39	Staghorn City	15	HC1	xl	e	0	0
377	Alive	Censored	Censored	Aruba's	HC6	45	e	9	s	-0.0102866	-0.0734195																		39	Staghorn City	3a	HC3	xl	e	10	0.1
377	Alive	Censored	Censored	South Commercial	HC7	1	e	10	s	-0.220478	-1.49514																		39	Staghorn City	9a	HC2	xl	e	0	0
377	Alive	Censored	Censored	South Commercial	HC7	2	n	10	l	5.12821	152.083																		39	Aruba's	8	HC6	xl	e	5	0.05
261	missing	Complete	Complete	South Commercial	HC7	3	p	10	s	NA	NA																		39	Aruba's	9	HC5	m	e	0	0
377	Alive	Censored	Censored	South Commercial	HC7	4	n	13	s	4.56412	64.5777																		39	Aruba's	10a	HC4	xl	e	35	0.35
377	Alive	Censored	Censored	South Commercial	HC7	5	e	10	xl	2.58427	234.324																		39	South Commercial	10	HC7	xl	e	0	0
377	Alive	Censored	Censored	South Commercial	HC7	6	n	10	s	0.995066	6.34555																		39	South Commercial	13	HC9	xl	e	0	0
377	Alive	Censored	Censored	South Commercial	HC7	7	e	10	l	0.728984	30.8782																		39	South Commercial	17	HC8	xl	e	0	0
29	Dead	Complete	Censored	South Commercial	HC7	8	n	13	s	NA	NA																		40	Staghorn City	9a	HC2	s	e	0	0
377	Alive	Censored	Censored	South Commercial	HC7	9	e	13	xl	1.20596	83.7665																		40	Aruba's	8	HC6	s	e	0	0
377	Alive	Censored	Censored	South Commercial	HC7	10	p	13	s	2.56827	28.6074																		40	South Commercial	10	HC7	s	e	0	0
377	Alive	Censored	Censored	South Commercial	HC7	11	e	17	l	3.83761	199.785																		40	South Commercial	17	HC8	s	e	0	0
377	Alive	Censored	Censored	South Commercial	HC7	12	e	13	m	2.62181	81.3279																		41	Staghorn City	15	HC2	l	n	0	0
377	Alive	Censored	Censored	South Commercial	HC7	13	n	17	s	8.5565	105.226																		41	Staghorn City	3a	HC1	l	n	0	0
377	Alive	Censored	Censored	South Commercial	HC7	14	p	10	l	2.65787	107.759																		41	Aruba's	8	HC4	m	n	0	0
377	Alive	Censored	Censored	South Commercial	HC7	15	e	17	m	1.58875	54.8234																		41	Aruba's	10a	HC5	l	n	0	0
377	Alive	Censored	Censored	South Commercial	HC7	16	p	13	m	3.36852	121.997																		41	South Commercial	10	HC8	l	n	0	0
377	Alive	Censored	Censored	South Commercial	HC7	17	p	10	m	3.55042	110.785																		41	South Commercial	13	HC7	m	n	0	0
377	Alive	Censored	Censored	South Commercial	HC7	18	n	10	xl	0.989661	71.2799																		42	Staghorn City	15	HC2	xl	p	0	0
377	Alive	Censored	Censored	South Commercial	HC7	19	p	13	m	3.86749	113.417																		42	Aruba's	15	HC6	xl	p	0	0
377	Alive	Censored	Censored	South Commercial	HC7	20	n	13	l	0.995102	76.7077																		42	Aruba's	10a	HC5	xl	p	5	0.05
377	Alive	Censored	Censored	South Commercial	HC7	21	n	17	xl	2.04517	210.861																		42	South Commercial	2	HC9	xl	p	0	0
377	Alive	Censored	Censored	South Commercial	HC7	22	p	17	m	3.09359	75.9263																		42	South Commercial	10	HC8	xl	p	1	0.01
156	missing	Complete	Complete	South Commercial	HC7	23	p	17	s	NA	NA																		42	South Commercial	13	HC7	xl	p	0	0
156	missing	Complete	Complete	South Commercial	HC7	24	e	13	s	NA	NA																		43	Staghorn City	3a	HC1	s	p	0	0
156	missing	Complete	Complete	South Commercial	HC7	25	e	10	m	NA	NA																		43	Staghorn City	9a	HC3	s	p	0	0
377	Alive	Censored	Censored	South Commercial	HC7	26	p	17	xl	1.72559	113.444																		43	Aruba's	8	HC4	m	p	0	0
377	Alive	Censored	Censored	South Commercial	HC7	27	n	17	m	-0.654233	-10.5777																		43	Aruba's	10a	HC5	s	p	10	0.1
377	Alive	Censored	Censored	South Commercial	HC7	28	n	10	m	3.972	129.46																		43	South Commercial	17	HC9	s	p	0	0
377	Dead	Complete	Censored	South Commercial	HC7	29	n	10	s	NA	NA																		44	Staghorn City	15	HC2	xl	e	0	0
261	missing	Complete	Complete	South Commercial	HC7	30	p	10	s	NA	NA																		44	Staghorn City	3a	HC1	xl	e	0	0
29	Dead	Complete	Censored	South Commercial	HC7	31	e	13	m	NA	NA																		44	Staghorn City	9a	HC3	l	e	0	0
261	missing	Complete	Complete	South Commercial	HC7	32	p	10	xl	NA	NA																		44	Aruba's	9	HC6	l	e	0	0
377	Alive	Censored	Censored	South Commercial	HC7	33	n	13	s	1.75493	14.0074																		44	Aruba's	10a	HC5	l	e	0	0
377	Alive	Censored	Censored	South Commercial	HC7	34	n	10	xl	1.80917	165.315																		44	South Commercial	2	HC9	xl	e	0	0
29	Dead	Complete	Censored	South Commercial	HC7	35	e	17	s	NA	NA																		44	South Commercial	13	HC7	l	e	0	0
377	Alive	Censored	Censored	South Commercial	HC7	36	p	10	m	3.6597	93.6781																		45	Staghorn City	3a	HC1	m	e	0	0
377	Alive	Censored	Censored	South Commercial	HC7	37	n	13	l	3.28869	205.029																		45	Aruba's	8	HC4	s	e	0	0
377	Alive	Censored	Censored	South Commercial	HC7	38	p	13	l	2.14666	84.207																		45	Aruba's	9	HC6	s	e	0	0
377	Alive	Censored	Censored	South Commercial	HC7	39	e	10	xl	1.7781	159.688																		45	South Commercial	10	HC8	m	e	85	0.85
377	Alive	Censored	Censored	South Commercial	HC7	40	e	10	s	-0.41662	-3.86501																		45	South Commercial	13	HC7	m	e	0	0
377	Alive	Censored	Censored	South Commercial	HC7	41	n	13	m	-0.652154	-14.6892
377	Alive	Censored	Censored	South Commercial	HC7	42	p	13	xl	2.60281	179.904
156	missing	Complete	Complete	South Commercial	HC7	43	p	13	s	NA	NA
377	Alive	Censored	Censored	South Commercial	HC7	44	e	13	l	2.39915	138.349
377	Alive	Censored	Censored	South Commercial	HC7	45	e	13	m	5.19088	101.539
377	Alive	Censored	Censored	South Commercial	HC8	1	e	17	s	0.376771	4.8824
377	Alive	Censored	Censored	South Commercial	HC8	2	n	17	m	3.75973	69.9164
261	missing	Complete	Complete	South Commercial	HC8	3	p	17	m	NA	NA
377	Alive	Censored	Censored	South Commercial	HC8	4	n	10	l	4.57889	170.611
377	Alive	Censored	Censored	South Commercial	HC8	5	e	15	l	-0.456205	-23.3264
377	Dead	Complete	Censored	South Commercial	HC8	6	n	17	s	NA	NA
377	Alive	Censored	Censored	South Commercial	HC8	7	e	17	m	2.4213	77.8509
377	Alive	Censored	Censored	South Commercial	HC8	8	n	10	s	0.186691	1.05934
377	Alive	Censored	Censored	South Commercial	HC8	9	e	10	l	2.83701	156.368
377	Alive	Censored	Censored	South Commercial	HC8	10	p	10	s	3.93092	42.6725
377	Alive	Censored	Censored	South Commercial	HC8	11	e	13	l	1.75046	95.2409
377	Alive	Censored	Censored	South Commercial	HC8	12	e	10	m	3.4368	125.191
377	Dead	Complete	Censored	South Commercial	HC8	13	n	13	s	NA	NA
377	Alive	Censored	Censored	South Commercial	HC8	14	p	15	l	4.03402	230.086
377	Alive	Censored	Censored	South Commercial	HC8	15	e	13	s	6.75971	96.7774
377	Alive	Censored	Censored	South Commercial	HC8	16	p	10	xl	1.75042	200.236
377	Alive	Censored	Censored	South Commercial	HC8	17	p	17	m	3.54867	127.33
377	Alive	Censored	Censored	South Commercial	HC8	18	n	15	m	0.334133	10.9552
377	Alive	Censored	Censored	South Commercial	HC8	19	p	10	m	2.98393	62.3122
377	Alive	Censored	Censored	South Commercial	HC8	20	n	10	l	3.17417	144.222
377	Alive	Censored	Censored	South Commercial	HC8	21	n	13	l	2.03903	95.351
261	Dead	Complete	Censored	South Commercial	HC8	22	p	13	m	NA	NA
377	Alive	Censored	Censored	South Commercial	HC8	23	p	13	s	5.8101	77.8195
156	missing	Complete	Complete	South Commercial	HC8	24	e	10	s	NA	NA
377	Alive	Censored	Censored	South Commercial	HC8	25	e	17	m	0.426435	13.011
377	Alive	Censored	Censored	South Commercial	HC8	26	p	13	l	3.10231	127.535
261	Dead	Complete	Censored	South Commercial	HC8	27	n	13	s	NA	NA
261	missing	Complete	Complete	South Commercial	HC8	28	n	17	m	NA	NA
377	Alive	Censored	Censored	South Commercial	HC8	29	n	17	s	-0.510919	-5.8893
377	Alive	Censored	Censored	South Commercial	HC8	30	p	17	s	8.33484	116.181
377	Alive	Censored	Censored	South Commercial	HC8	31	e	10	l	3.22976	157.537
377	Alive	Censored	Censored	South Commercial	HC8	32	p	15	m	2.45979	67.3624
261	Dead	Complete	Censored	South Commercial	HC8	33	n	10	s	NA	NA
261	missing	Complete	Complete	South Commercial	HC8	34	n	15	l	NA	NA
29	Dead	Complete	Censored	South Commercial	HC8	35	e	13	s	NA	NA
29	Dead	Complete	Censored	South Commercial	HC8	36	p	17	m	NA	NA
261	Dead	Complete	Censored	South Commercial	HC8	37	n	10	xl	NA	NA
156	missing	Complete	Complete	South Commercial	HC8	38	p	10	m	NA	NA
377	Alive	Censored	Censored	South Commercial	HC8	39	e	17	xl	3.63248	245.95
377	Alive	Censored	Censored	South Commercial	HC8	40	e	17	s	0.399396	3.46645
377	Alive	Censored	Censored	South Commercial	HC8	41	n	10	l	-0.544833	-34.2869
377	Alive	Censored	Censored	South Commercial	HC8	42	p	10	xl	1.97043	176.133
156	Dead	Complete	Censored	South Commercial	HC8	43	p	10	s	NA	NA
261	Dead	Complete	Censored	South Commercial	HC8	44	e	10	xl	NA	NA
377	Alive	Censored	Censored	South Commercial	HC8	45	e	10	m	-0.425354	-6.9329
377	Alive	Censored	Censored	South Commercial	HC9	1	e	13	s	6.06614	76.4769
377	Alive	Censored	Censored	South Commercial	HC9	2	n	13	s	-0.56055	-7.91358
261	missing	Complete	Complete	South Commercial	HC9	3	p	13	s	NA	NA
377	Alive	Censored	Censored	South Commercial	HC9	4	n	17	s	-0.917682	-14.6157
377	Alive	Censored	Censored	South Commercial	HC9	5	e	13	xl	1.17505	107.014
377	Alive	Censored	Censored	South Commercial	HC9	6	n	13	s	0.778644	6.80704
377	Alive	Censored	Censored	South Commercial	HC9	7	e	13	m	3.53874	66.8275
377	Alive	Censored	Censored	South Commercial	HC9	8	n	17	s	-0.722062	-10.5042
377	Alive	Censored	Censored	South Commercial	HC9	9	e	2	xl	5.16928	301.398
377	Dead	Complete	Censored	South Commercial	HC9	10	p	17	s	NA	NA
377	Alive	Censored	Censored	South Commercial	HC9	11	e	10	l	4.06368	207.824
377	Alive	Censored	Censored	South Commercial	HC9	12	e	17	m	0.334246	8.96243
377	Alive	Censored	Censored	South Commercial	HC9	13	n	10	s	2.29248	22.8545
377	Alive	Censored	Censored	South Commercial	HC9	14	p	13	xl	1.67306	133.136
377	Alive	Censored	Censored	South Commercial	HC9	15	e	10	m	3.08463	99.5831
377	Alive	Censored	Censored	South Commercial	HC9	16	p	2	xl	3.0229	305.929
377	Alive	Censored	Censored	South Commercial	HC9	17	p	13	l	4.76312	192.338
156	Dead	Complete	Censored	South Commercial	HC9	18	n	13	l	NA	NA
377	Alive	Censored	Censored	South Commercial	HC9	19	p	17	m	2.44913	72.8374
377	Alive	Censored	Censored	South Commercial	HC9	20	n	2	xl	4.6608	333.272
377	Alive	Censored	Censored	South Commercial	HC9	21	n	10	xl	1.0497	98.6864
377	Alive	Censored	Censored	South Commercial	HC9	22	p	10	l	3.21079	140.751
377	Alive	Censored	Censored	South Commercial	HC9	23	p	10	s	3.14763	29.63
261	missing	Complete	Complete	South Commercial	HC9	24	e	17	s	NA	NA
377	Alive	Censored	Censored	South Commercial	HC9	25	e	13	m	3.00513	52.1803
377	Alive	Censored	Censored	South Commercial	HC9	26	p	10	xl	1.67041	150.568
377	Alive	Censored	Censored	South Commercial	HC9	27	n	10	m	3.39855	113.229
377	Alive	Censored	Censored	South Commercial	HC9	28	n	13	s	2.81339	40.5591
377	Alive	Censored	Censored	South Commercial	HC9	29	n	13	s	1.561	17.0438
261	missing	Complete	Complete	South Commercial	HC9	30	p	13	s	NA	NA
261	missing	Complete	Complete	South Commercial	HC9	31	e	17	m	NA	NA
377	Alive	Censored	Censored	South Commercial	HC9	32	p	13	l	2.61696	115.048
377	Alive	Censored	Censored	South Commercial	HC9	33	n	17	s	0.666667	6.83851
377	Alive	Censored	Censored	South Commercial	HC9	34	n	13	xl	1.64681	149.304
377	Alive	Censored	Censored	South Commercial	HC9	35	e	10	s	2.85688	8.1653
377	Alive	Censored	Censored	South Commercial	HC9	36	p	13	m	2.96697	49.9305
377	Alive	Censored	Censored	South Commercial	HC9	37	n	15	xl	5.93343	379.558
377	Alive	Censored	Censored	South Commercial	HC9	38	p	17	m	1.67935	43.2861
377	Alive	Censored	Censored	South Commercial	HC9	39	e	13	xl	1.88507	140.032
156	Dead	Complete	Censored	South Commercial	HC9	40	e	13	s	NA	NA
261	missing	Complete	Complete	South Commercial	HC9	41	n	17	m	NA	NA
377	Alive	Censored	Censored	South Commercial	HC9	42	p	2	xl	1.77002	206.414
377	Alive	Censored	Censored	South Commercial	HC9	43	p	17	s	4.57988	28.4134
377	Alive	Censored	Censored	South Commercial	HC9	44	e	2	xl	2.33912	406.183
261	missing	Complete	Complete	South Commercial	HC9	45	e	17	s	NA	NA
